# Supplementary material for: Activation of non-polar bonds by an electron-rich gallagermylene
Source: Royal Society of Chemistry journal article supplement (doi:10.1039/d3cc06223f), 2024-01-01
Supplement: d3cc06223f1.pdf [file d3cc06223f1.pdf]

## Supporting Information

### Activation of Non-Polar Bonds by an Electron-Rich Gallagermylene

*Anna Bücken,<sup>a</sup> Alexander Gehlhaar,<sup>a</sup> Christoph Wölper,<sup>a</sup> and Stephan Schulz<sup>\*a,b</sup>*

<sup>a</sup> Institute of Inorganic Chemistry, University of Duisburg-Essen, 45117 Essen, Germany. E-mail: [stephan.schulz@uni-due.de](mailto:stephan.schulz@uni-due.de).

<sup>b</sup> Center for Nanointegration Duisburg-Essen (CENIDE), University of Duisburg-Essen, 47057 Duisburg, Germany.

E-mail Corresponding author: [stephan.schulz@uni-due.de](mailto:stephan.schulz@uni-due.de).

## Content

### I. Experimental Section

#### II. Spectroscopic Characterization

**Figure S4:**  $^1\text{H}$  NMR spectrum of **2** in  $\text{C}_6\text{D}_6$ .

**Figure S5:**  $^{13}\text{C}$  NMR spectrum of **2** in  $\text{C}_6\text{D}_6$ .

**Figure S6:** IR spectrum of **2**.

**Figure S7:**  $^1\text{H}$  NMR spectrum of **3** in  $\text{C}_6\text{D}_6$ .

**Figure S8:**  $^{13}\text{C}$  NMR spectrum of **3** in  $\text{C}_6\text{D}_6$ .

**Figure S9:**  $^{31}\text{P}$  NMR spectrum (low field) of **3** in  $\text{C}_6\text{D}_6$ .

**Figure S10:**  $^{31}\text{P}$  NMR spectrum (high field) of **3** in  $\text{C}_6\text{D}_6$ .

**Figure S11:** IR spectrum of **3**.

**Figure S12:** Initial *in situ*  $^1\text{H}$  NMR spectrum of **1** and **H2** at r.t.

**Figure S13:** Initial *in situ*  $^1\text{H}$  NMR spectrum of **1** and **P4** at r.t.

#### III. Crystallographic Data

**Table S3.** Crystallographic details of compounds **2** and **3**.

#### IV. Quantum Chemical Calculations

**Table S1.** NBO analysis of **1\_opt** and **A-C** including the natural atomic partial charges  $Q$  [e], Wiberg bond indices (WBI) [a.u.], Mayer bond orders (MBO) [a.u.] and orbital character of the Ge lone-pair [%].

**Table S2.** Comparison of the computed electronic properties of acyclic germylenes **A-C** and **1\_opt** in  $\text{H}_2$  activation. The root mean square deviation (RMSD) from the experimental structure is given in %.

**Figure S1.** Comparison of frontier orbital energies ( $E_{\text{HOMO}}$ ,  $E_{\text{LUMO}}$ ) [eV] and the energy gap ( $E_{\text{HOMO-LUMO}}$ ) [eV] of **A-C** and **1\_opt**.

**Figure S2.** Frontier orbitals of **A**, **B**, **C** and **1\_opt** (isovalue 0.03). The hydrogens are omitted for clarity.

**Figure S3.** Comparison of the computed natural partial charge [e] of the Ge atom in **A-C** and **1\_opt**.

**Table S4.** Cartesian coordinates [ $\text{\AA}$ ] of computed compounds **A**, **B**, **C** and **1\_opt** with the corresponding final single point energies (FSPE) [Ha].

#### V. References

## I. Experimental Section

**General Procedure.** All experiments were performed in a glovebox or using standard Schlenkline techniques under argon atmosphere. Toluene and *n*-hexane were dried using an mBraun Solvent Purification System (SPS), degassed and stored in Schlenk flasks under argon atmosphere. Deuterated solvents were stored over molecular sieves (4 Å) and degassed prior to use. The anhydrous nature of the solvents was verified by Karl Fischer titration. LGa( $\mu$ -Cl)GeDMP (**1**) was synthesized according to literature procedure.<sup>1</sup>

**Spectroscopic methods.** <sup>1</sup>H (400 MHz) and <sup>13</sup>C{<sup>1</sup>H} (100 MHz) NMR spectra were recorded using a Ascend™ 400 spectrometer. The spectra were referenced to internal C<sub>6</sub>D<sub>5</sub>H (<sup>1</sup>H:  $\delta$  = 7.16, C<sub>6</sub>D<sub>6</sub>) or to natural-abundance carbon resonances C<sub>6</sub>D<sub>6</sub> (<sup>13</sup>C:  $\delta$  = 128.06, C<sub>6</sub>D<sub>6</sub>). IR spectra were recorded with an ALPHA-T FT-IR spectrometer equipped with a single reflection ATR sampling module. The IR spectrometer was placed in a glovebox to guarantee measurements under inert gas conditions.

**Synthesis of L(Cl)GaGe(H)<sub>2</sub>Ar<sup>Mes</sup> 2.** A solution of **1** (43 mg, 0.047 mmol) in 0.5 mL of benzene-*d*<sub>6</sub> in a *J*-Young NMR tube was degassed at -196 °C and then exposed to a hydrogen solution (1 atm) at r.t., upon which the initially dark red solution immediately turned colourless. The solution was transferred into a Schlenk tube and concentrated in vacuo until incipient crystallization. Colourless crystals of **2** were obtained upon storage at 6 °C. Yield: 29 mg, 0.032 mmol, 68 %, m.p. 213-214 °C. **<sup>1</sup>H NMR (400 MHz, C<sub>6</sub>D<sub>6</sub>, 298 K):  $\delta$  [ppm] = 7.19 – 7.13 (m, 9H, ArH, overlapping with solvent), 7.10 (dd, <sup>3</sup>J<sub>HH</sub> = 7.7, 1.7 Hz, 2H, ArH), 7.03 (dd, <sup>3</sup>J<sub>HH</sub> = 7.5, 1.7 Hz, 3H, ArH), 6.81 (s, 4H, ArH), 6.71 (d, <sup>3</sup>J<sub>HH</sub> = 7.5 Hz, 2H, ArH), 4.90 (s, 1H,  $\gamma$ -CH), 3.64 (sept, <sup>3</sup>J<sub>HH</sub> = 6.7 Hz, 2H, CH(CH<sub>3</sub>)<sub>2</sub>), 3.33 (s, 2H, GeH), 2.92 (sept, <sup>3</sup>J<sub>HH</sub> = 6.8 Hz, 2H, CH(CH<sub>3</sub>)<sub>2</sub>), 2.33 (s, 6H, *p*-CH<sub>3</sub>), 1.93 (s, 12H, *o*-CH<sub>3</sub>), 1.45 (s, 6H, NCCCH<sub>3</sub>), 1.19 (d, <sup>3</sup>J<sub>HH</sub> = 6.8 Hz, 6H, CH(CH<sub>3</sub>)<sub>2</sub>), 1.10 (d, <sup>3</sup>J<sub>HH</sub> = 6.6 Hz, 6H, CH(CH<sub>3</sub>)<sub>2</sub>), 1.07 (d, <sup>3</sup>J<sub>HH</sub> = 6.8 Hz, 6H, CH(CH<sub>3</sub>)<sub>2</sub>), 0.94 (d, <sup>3</sup>J<sub>HH</sub> = 6.7 Hz, 6H, CH(CH<sub>3</sub>)<sub>2</sub>). **<sup>13</sup>C NMR (101 MHz, C<sub>6</sub>D<sub>6</sub>, 298 K):  $\delta$  [ppm] = 169.21 (NCCCH<sub>3</sub>), 150.03, 146.05, 143.17, 142.01, 141.50, 136.18, 136.11, 129.60, 129.14, 129.01, 127.84, 125.23, 124.19, 99.27 ( $\gamma$ -C), 29.52 (CH(CH<sub>3</sub>)<sub>2</sub>), 28.27 (CH(CH<sub>3</sub>)<sub>2</sub>), 27.83 (CH(CH<sub>3</sub>)<sub>2</sub>), 25.05 (CH(CH<sub>3</sub>)<sub>2</sub>), 24.30 (CH(CH<sub>3</sub>)<sub>2</sub>), 24.18 (NCCCH<sub>3</sub>), 23.89 (CH(CH<sub>3</sub>)<sub>2</sub>), 21.76 (*p*-CH<sub>3</sub>), 21.49 (*o*-CH<sub>3</sub>). **IR(ATR):  $\nu$  [cm<sup>-1</sup>] = 2967, 2917, 2863, 2051, 2019, 1942, 1518, 1439, 1380, 1315, 1259, 1177, 1102, 1021, 934, 869, 848, 798, 759, 717, 639, 532, 444.******

**Synthesis of L(Cl)Ga(P<sub>4</sub>)GeAr<sup>Mes</sup> 3.** P<sub>4</sub> (3.3 mg, 0.026 mmol) was added to a solution of **1** (24 mg, 0.026 mmol) in 0.5 mL of benzene-*d*<sub>6</sub> in a *J*-Young NMR tube. The dark red solution turned yellow and was stirred for ten minutes. The solution was transferred into a Schlenk tube and the solvent was removed in vacuo. The residue was dissolved in 1 mL of boiling *n*-hexane and crystallised at r. t. The yellow crystals were washed with *n*-hexane (3x 0.2 mL) and dried in vacuo. Yield: 15 mg, 0.015 mmol, 55 %, m.p. 285 °C. **<sup>1</sup>H-NMR (400 MHz, C<sub>6</sub>D<sub>6</sub>, 298 K):  $\delta$  [ppm] = 7.27 – 7.12 (m, 9H, ArH, overlapping with solvent), 7.01 (dd, <sup>3</sup>J<sub>HH</sub> = 7.7, 1.5 Hz, 1H, ArH), 6.98 (t, <sup>3</sup>J<sub>HH</sub> = 7.7 Hz, 1H, ArH), 6.89 (t, <sup>3</sup>J<sub>HH</sub> = 7.7 Hz, 1H, m ArH), 6.75 (dd, <sup>3</sup>J<sub>HH</sub> = 7.7, 1.3 Hz, 1H, ArH), 6.70 (s, 2H, ArH), 6.68 (s, 1H, ArH), 4.81 (s, 1H,  $\gamma$ -CH), 3.95 (sept, <sup>3</sup>J<sub>HH</sub> = 6.7 Hz, 1H, CH(CH<sub>3</sub>)<sub>2</sub>), 3.55 (sept, <sup>3</sup>J<sub>HH</sub> = 6.7 Hz, 1H, CH(CH<sub>3</sub>)<sub>2</sub>), 3.11 (sept, <sup>3</sup>J<sub>HH</sub> = 6.9 Hz, 1H), 2.68 (sept, <sup>3</sup>J<sub>HH</sub> = 6.8 Hz, 1H, CH(CH<sub>3</sub>)<sub>2</sub>), 2.40 (s, 6H, Mes-CH<sub>3</sub>), 2.35 (s, 6H, Mes-CH<sub>3</sub>), 2.15 (d, <sup>3</sup>J<sub>HH</sub> = 6.6 Hz, 3H, CH(CH<sub>3</sub>)<sub>2</sub>), 1.54 (s, 3H, NCCCH<sub>3</sub>), 1.46 (d, <sup>3</sup>J<sub>HH</sub> = 6.8 Hz, 3H, CH(CH<sub>3</sub>)<sub>2</sub>), 1.43 (s, 3H, NCCCH<sub>3</sub>), 1.33 (d, <sup>3</sup>J<sub>HH</sub> = 6.8 Hz, 3H, CH(CH<sub>3</sub>)<sub>2</sub>), 1.16 (d, <sup>3</sup>J<sub>HH</sub> = 6.9 Hz, 3H, CH(CH<sub>3</sub>)<sub>2</sub>), 1.14 (d, <sup>3</sup>J<sub>HH</sub> = 6.7 Hz, 3H, CH(CH<sub>3</sub>)<sub>2</sub>), 1.10 (d, <sup>3</sup>J<sub>HH</sub> = 6.9 Hz, 3H, CH(CH<sub>3</sub>)<sub>2</sub>), 0.96 (d, <sup>3</sup>J<sub>HH</sub> = 6.8 Hz, 3H, CH(CH<sub>3</sub>)<sub>2</sub>), 0.90 (d, <sup>3</sup>J<sub>HH</sub> = 6.8 Hz, 3H, CH(CH<sub>3</sub>)<sub>2</sub>). **<sup>13</sup>C-NMR (101 MHz, C<sub>6</sub>D<sub>6</sub>, 298 K):  $\delta$  [ppm] = 169.8 (NCCCH<sub>3</sub>), 169.6 (NCCCH<sub>3</sub>), 146.3 (Ar), 146.3 (Ar), 143.4 (Ar), 143.1 (Ar), 143.0 (Ar), 142.0 (Ar), 141.9 (Ar), 141.7 (Ar), 138.0 (Ar), 137.4 (Ar), 136.9 (Ar), 136.6 (Ar), 131.3 (Ar), 129.8 (Ar), 128.9 (Ar), 126.3 (Ar), 125.9****

(Ar), 125.2 (Ar), 125.2 (Ar), 124.6 (Ar), 97.8 ( $\gamma$ -C), 32.2 ( $\underline{\text{C}}\text{H}(\text{CH}_3)_2$ ), 30.3 ( $\underline{\text{C}}\text{H}(\text{CH}_3)_2$ ), 29.6 ( $\underline{\text{C}}\text{H}(\text{CH}_3)_2$ ), 28.9 ( $\text{CH}(\underline{\text{C}}\text{H}_3)_2$ ), 28.1 ( $\underline{\text{C}}\text{H}(\text{CH}_3)_2$ ), 27.8 ( $\text{CH}(\underline{\text{C}}\text{H}_3)_2$ ), 26.0 ( $\text{CH}(\underline{\text{C}}\text{H}_3)_2$ ), 25.4 ( $\text{CH}(\underline{\text{C}}\text{H}_3)_2$ ), 25.2 ( $\text{CH}(\underline{\text{C}}\text{H}_3)_2$ ), 24.5 ( $\text{CH}(\underline{\text{C}}\text{H}_3)_2$ ), 24.2 ( $\text{NC}\underline{\text{C}}\text{H}_3$ ), 24.0 ( $\text{NC}\underline{\text{C}}\text{H}_3$ ), 23.3 ( $\text{CH}(\underline{\text{C}}\text{H}_3)_2$ ), 21.8 ( $\text{Mes-}\underline{\text{C}}\text{H}_3$ ), 21.2 ( $\text{Mes-}\underline{\text{C}}\text{H}_3$ ), 14.6 ( $\text{CH}(\underline{\text{C}}\text{H}_3)_2$ ).  **$^{31}\text{P-NMR}$  (162 MHz,  $\text{C}_6\text{D}_6$ , 298 K):  $\delta$  [ppm] = 198.49 (dd,  $J_{\text{PP}} = 141.9, 23.4$  Hz), -72.30 (dd,  $J_{\text{PP}} = 63.9, 36.0$  Hz), -175.48 (ddd,  $J_{\text{PP}} = 174.0, 157.0, 140.6$  Hz), -231.38 (dd,  $J_{\text{PP}} = 173.8, 35.3$  Hz). **IR(ATR):  $\nu$ [ $\text{cm}^{-1}$ ]:** 2963, 2917, 2863, 1611, 1529, 1439, 1384, 1313, 1260, 1179, 1098, 1020, 941, 867, 848, 796, 778, 759, 740, 709, 641, 575, 529, 513, 438.**

## II. Spectroscopic Characterization

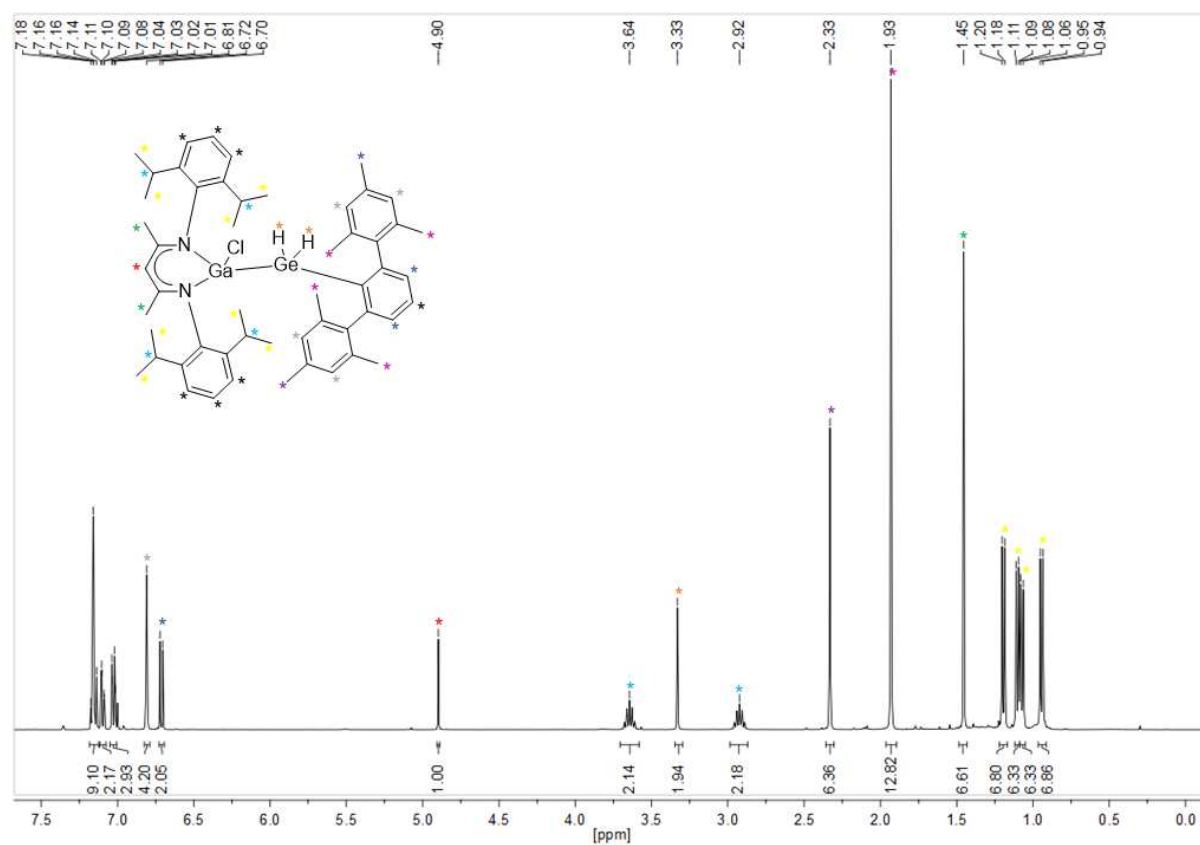

Figure S4:  $^1\text{H}$  NMR spectrum of **2** in  $\text{C}_6\text{D}_6$ .

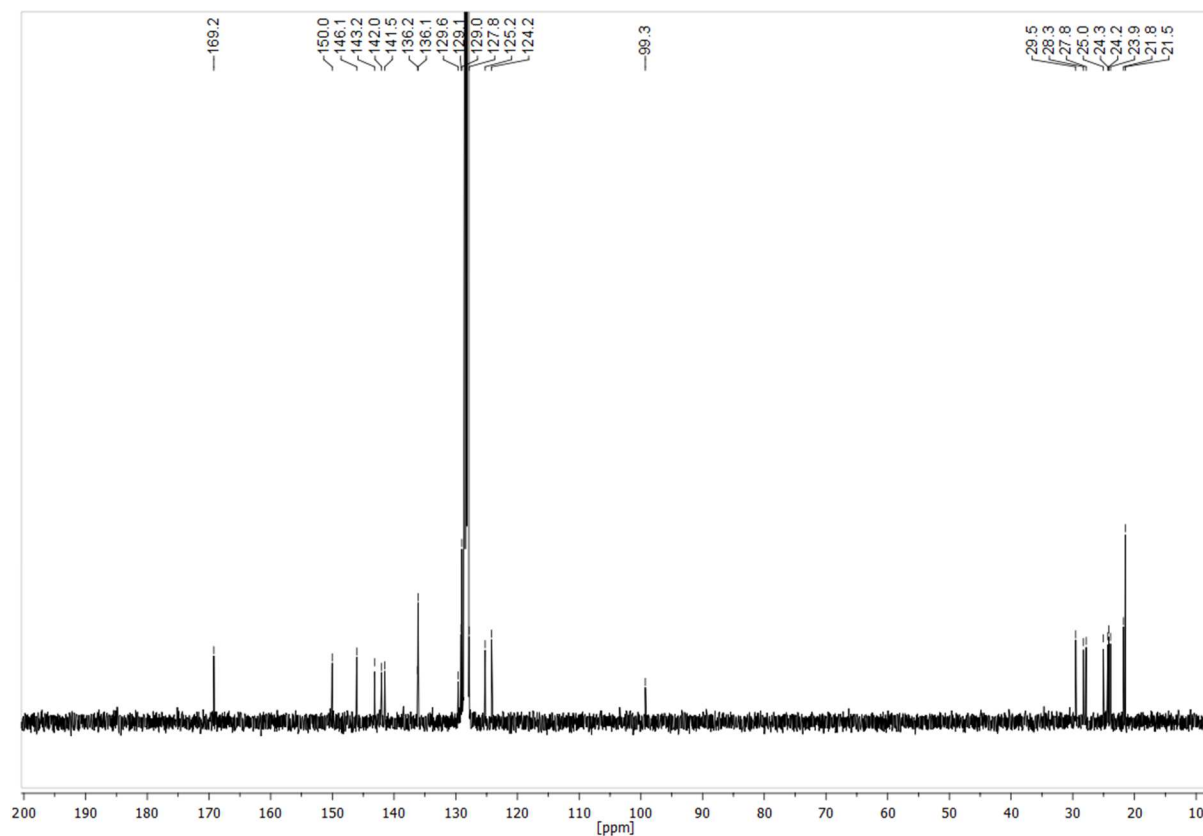

Figure S5:  $^{13}\text{C}$  NMR spectrum of **2** in  $\text{C}_6\text{D}_6$ .

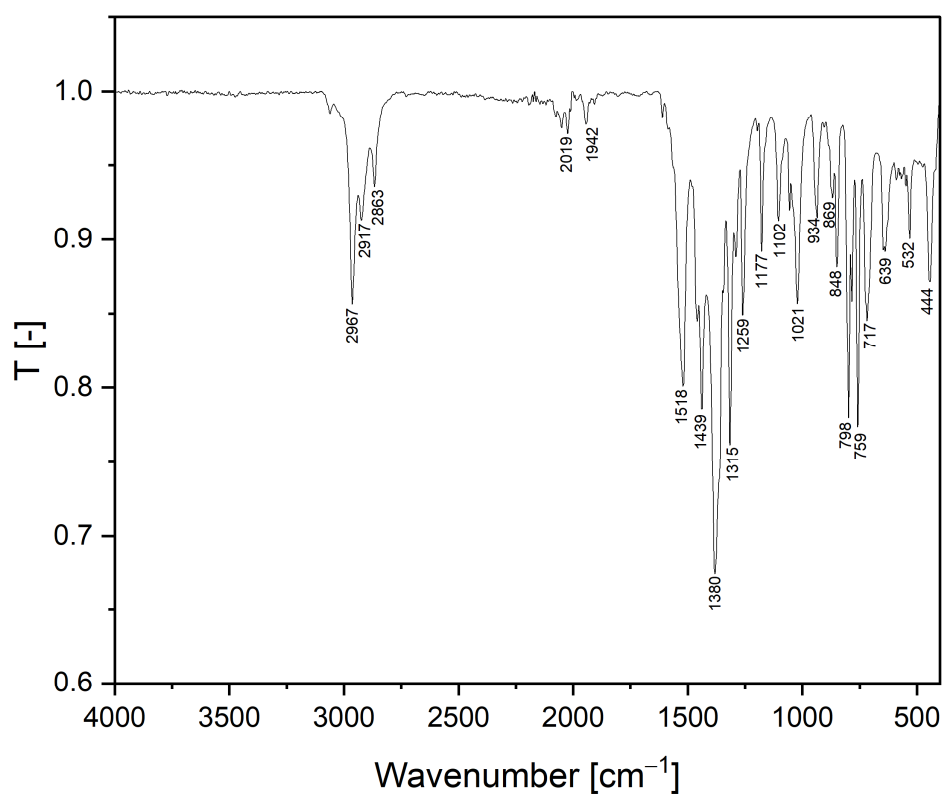

Figure S6: IR spectrum of **2**.

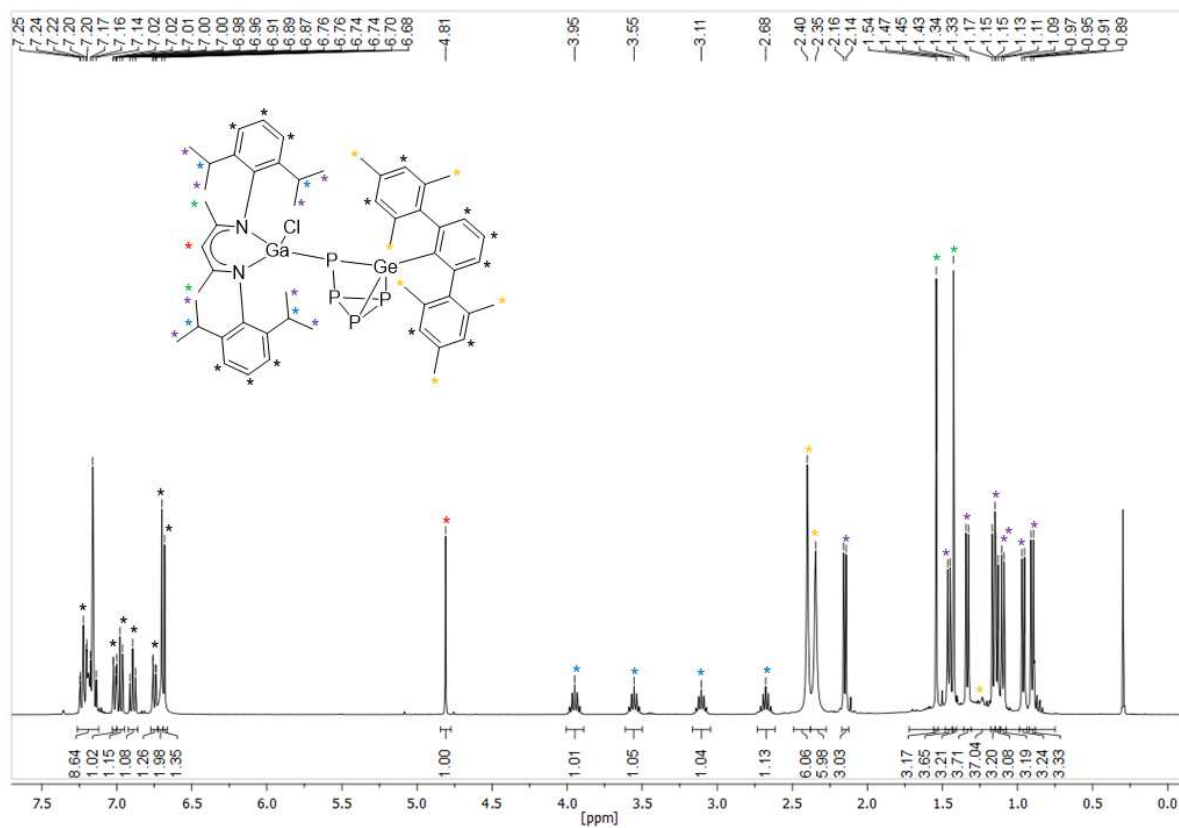

Figure S7. <sup>1</sup>H NMR spectrum of **3** in C<sub>6</sub>D<sub>6</sub>.

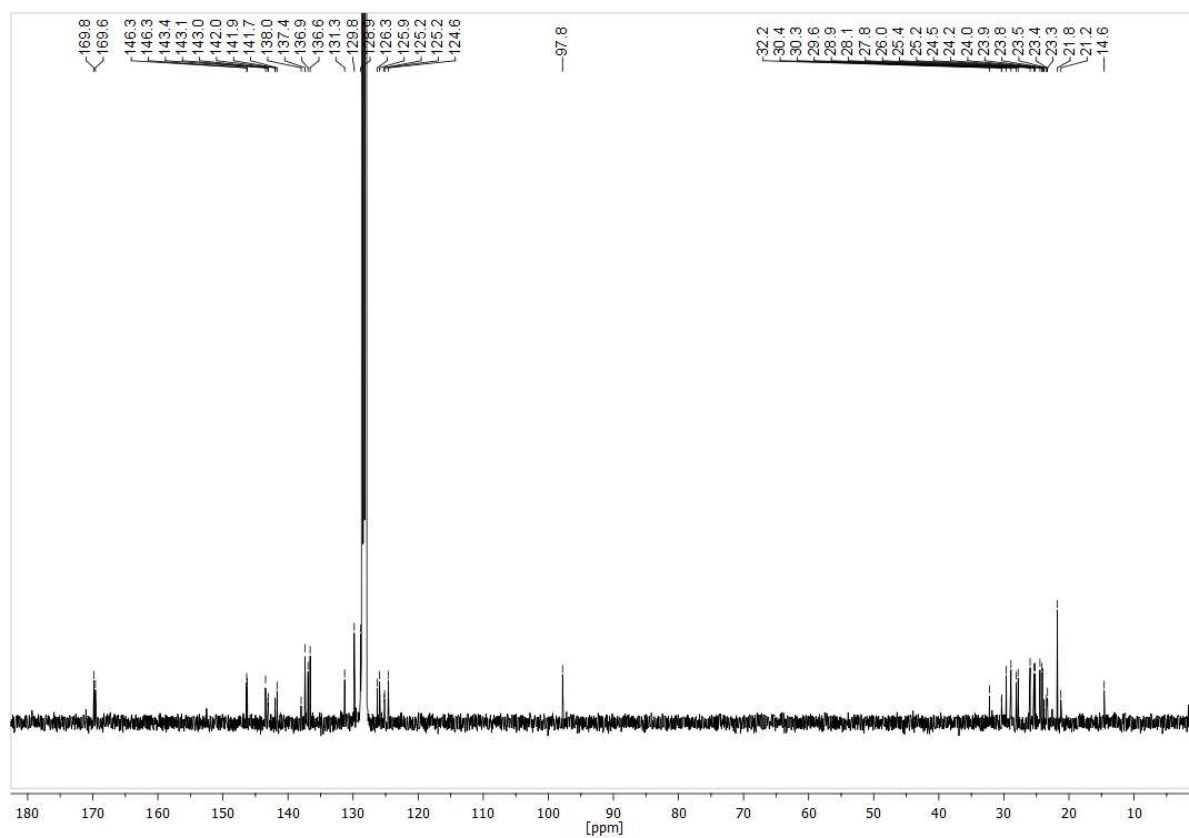

Figure S8. <sup>13</sup>C NMR spectrum of **3** in C<sub>6</sub>D<sub>6</sub>.

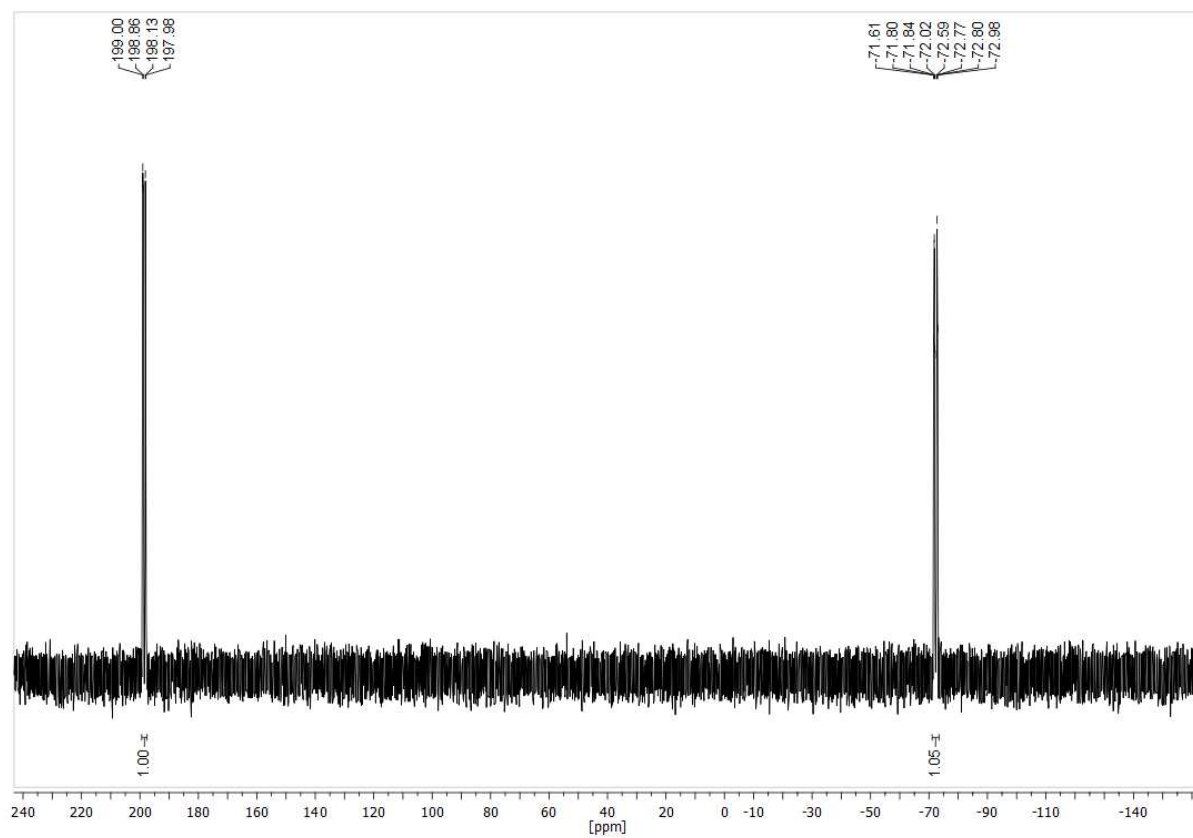

**Figure S9.** <sup>31</sup>P NMR spectrum (low field) of **3** in C<sub>6</sub>D<sub>6</sub>.

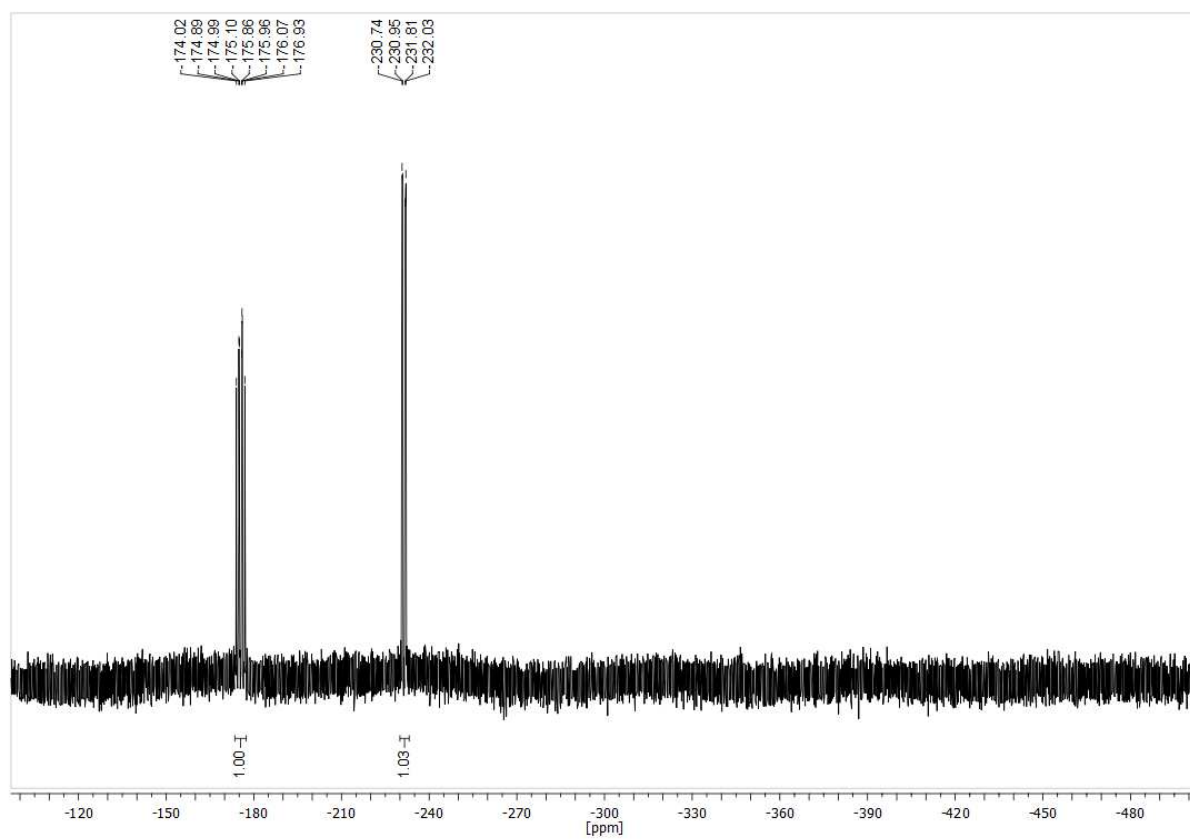

**Figure S10.** <sup>31</sup>P NMR spectrum (high field) of **3** in C<sub>6</sub>D<sub>6</sub>.



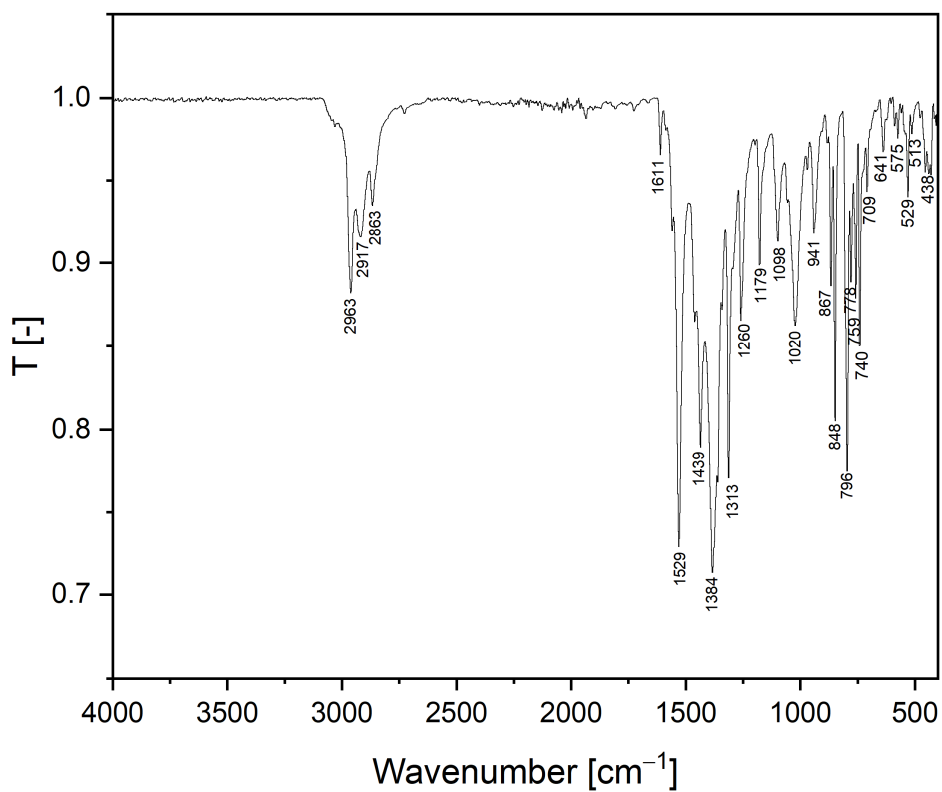

Figure S11. IR spectrum of **3**.

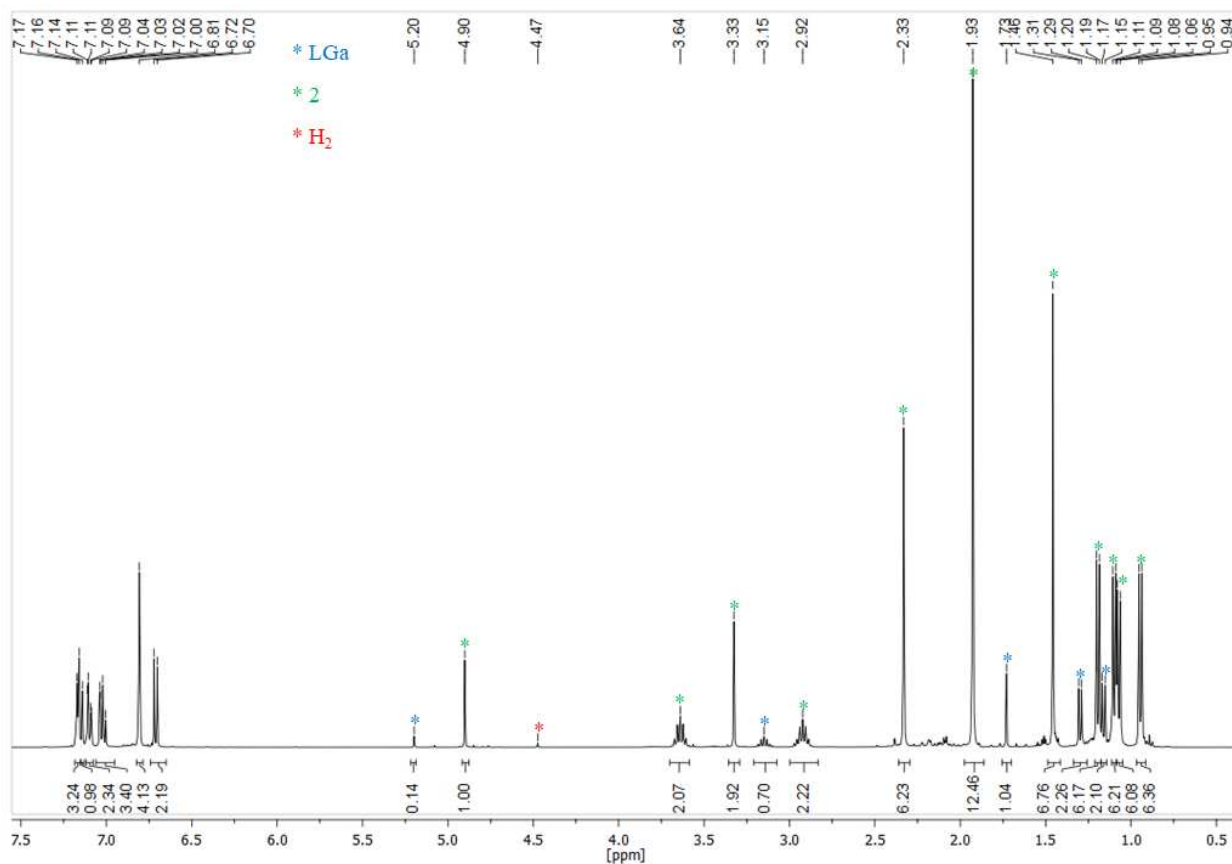

Figure S12. Initial *in situ* <sup>1</sup>H NMR spectrum of **1** and H<sub>2</sub> at r.t.

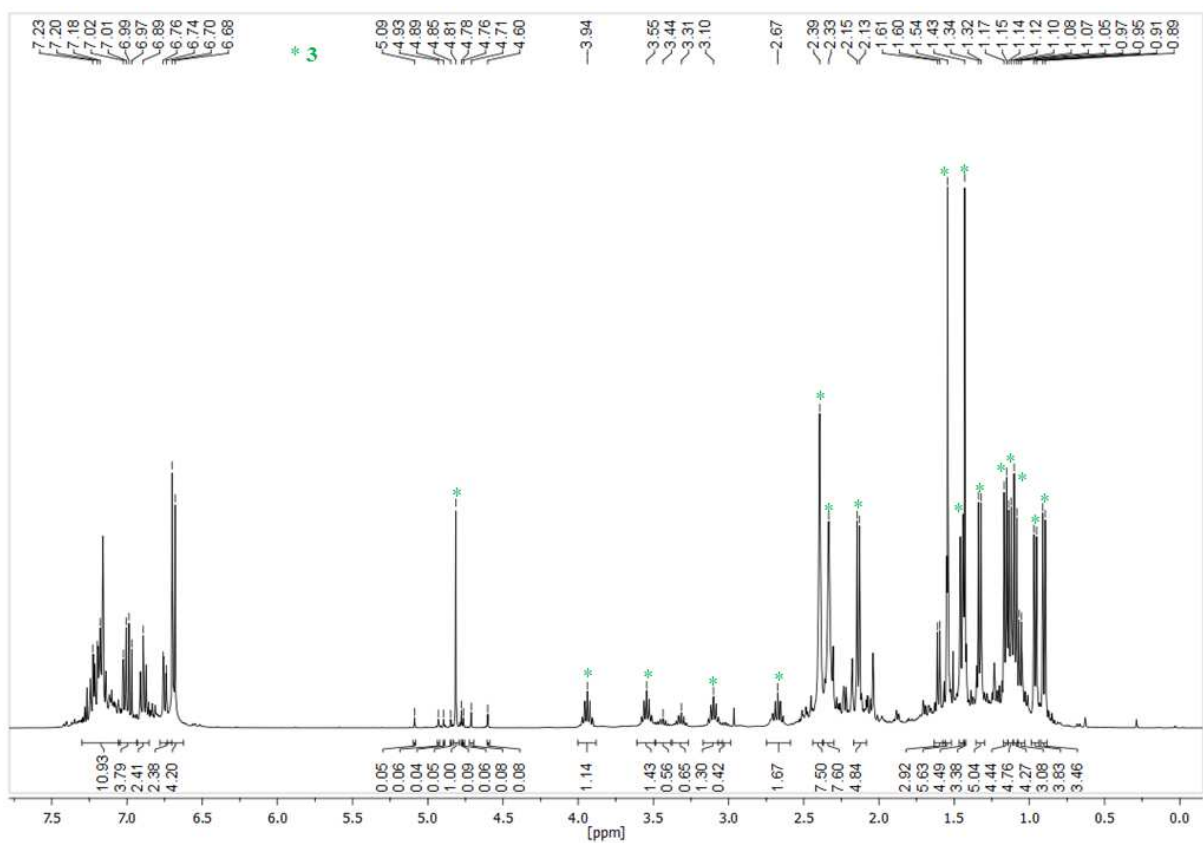

Figure S13. Initial *in situ*  $^1\text{H}$  NMR spectrum of **1** and  $\text{P}_4$  at r.t.

### III. Crystallographic Data

**Single-crystal X-ray analyses.** The crystals were mounted on nylon loops in inert oil. Data were collected on a Bruker AXS D8 Kappa diffractometer with APEX2 detector (monochromated  $\text{Mo}_{K\alpha}$  radiation,  $\lambda = 0.71073 \text{ \AA}$ ) at 100(2) K. The structures were solved by Direct Methods (SHELXS-2013)<sup>2</sup> and refined anisotropically by full-matrix least-squares on  $F^2$  (SHELXL-2017).<sup>3,4</sup> Absorption corrections were performed semi-empirically from equivalent reflections on basis of multi-scans (Bruker AXS APEX3). Hydrogen atoms were refined using a riding model or rigid methyl groups.

In **2** an isopropyl group is disordered over two positions. Its displacement parameters were restrained with RIGU and SIMU and those of C15 and C15' constrained to be equal due to the atoms' close proximity (EADP).

In **3** also an isopropyl group is disordered over two positions. In this case its bond lengths were restrained to be equal (SADI) and RIGU restraints were applied to the displacement parameters of the disordered atoms.

CCDC-2321151 (**2**), and -2321152 (**3**) contain the supplementary crystallographic data for this paper. These data can be obtained free of charge from The Cambridge Crystallographic Data Centre via [www.ccdc.cam.ac.uk/data\\_request/cif](http://www.ccdc.cam.ac.uk/data_request/cif).

**Table S3.** Crystallographic details of compounds **2** and **3**.

| <b>Identification code</b>                                   | <b>2 (ab_316m2)</b>                                               | <b>3 (ab_255am3)</b>                                                |
|--------------------------------------------------------------|-------------------------------------------------------------------|---------------------------------------------------------------------|
| Empirical formula                                            | C <sub>56</sub> H <sub>71</sub> ClGaGeN <sub>2</sub>              | C <sub>53</sub> H <sub>66</sub> ClGaGeN <sub>2</sub> P <sub>4</sub> |
| <i>M</i>                                                     | 949.90                                                            | 1032.71                                                             |
| Crystal size [mm]                                            | 0.281 × 0.140 × 0.139                                             | 0.604 × 0.300 × 0.172                                               |
| <i>T</i> [K]                                                 | 100(2)                                                            | 100(2)                                                              |
| Crystal system                                               | triclinic                                                         | monoclinic                                                          |
| Space group                                                  | <i>P</i> $\bar{1}$                                                | <i>C</i> 2/ <i>c</i>                                                |
| <i>a</i> [Å]                                                 | 11.3222(11)                                                       | 45.016(4)                                                           |
| <i>b</i> [Å]                                                 | 12.2948(12)                                                       | 10.0401(8)                                                          |
| <i>c</i> [Å]                                                 | 20.0701(19)                                                       | 23.3390(18)                                                         |
| $\alpha$ [°]                                                 | 98.212(4)                                                         | 90                                                                  |
| $\beta$ [°]                                                  | 91.794(4)                                                         | 102.560(4)                                                          |
| $\gamma$ [°]                                                 | 114.236(4)                                                        | 90                                                                  |
| <i>V</i> [Å <sup>3</sup> ]                                   | 2508.9(4)                                                         | 10296.0(14)                                                         |
| <i>Z</i>                                                     | 2                                                                 | 8                                                                   |
| <i>D</i> <sub>calc</sub> [g·cm <sup>-3</sup> ]               | 1.257                                                             | 1.332                                                               |
| $\mu$ (MoK $\alpha$ ) [mm <sup>-1</sup> ]                    | 1.226                                                             | 1.320                                                               |
| Transmissions                                                | 0.75/0.64                                                         | 0.75/0.59                                                           |
| <i>F</i> (000)                                               | 1002                                                              | 4304                                                                |
| Index ranges                                                 | -17 ≤ <i>h</i> ≤ 17<br>-18 ≤ <i>k</i> ≤ 18<br>-30 ≤ <i>l</i> ≤ 30 | -81 ≤ <i>h</i> ≤ 81<br>-18 ≤ <i>k</i> ≤ 18<br>-42 ≤ <i>l</i> ≤ 42   |
| $\theta$ <sub>max</sub> [°]                                  | 32.829                                                            | 40.401                                                              |
| Reflections collected                                        | 191527                                                            | 387884                                                              |
| Independent reflections                                      | 18497                                                             | 32569                                                               |
| <i>R</i> <sub>int</sub>                                      | 0.0918                                                            | 0.0585                                                              |
| Refined parameters                                           | 598                                                               | 596                                                                 |
| <i>R</i> <sub>1</sub> [ <i>I</i> > 2σ( <i>I</i> )]           | 0.0424                                                            | 0.0413                                                              |
| <i>wR</i> <sub>2</sub> [all data]                            | 0.1106                                                            | 0.1064                                                              |
| GooF                                                         | 1.025                                                             | 1.113                                                               |
| $\Delta\rho$ <sub>final</sub> (max/min) [e·Å <sup>-3</sup> ] | 1.189/-0.586                                                      | 1.995/-0.688                                                        |

#### IV. Quantum Chemical Calculations

All computations including geometry optimization and single-point computations were performed using ORCA 5.0.4<sup>5</sup> at the def2-TZVPP level of theory (def2-QZVP for E>Ne)<sup>7</sup> using the atom-pairwise dispersion correction based on tight binding partial charges (D4)<sup>8,9</sup> with the PBE0<sup>10,11</sup> functional. As in our previous studies<sup>1</sup> the geometry optimization for **1** resulted in a shift of the Cl towards the Ge center, resulting in structure **1\_opt**. Frequency computations were performed to verify the nature of the stationary point. Natural bond orbital analysis was performed using the NBO program package (version 7.0.10).<sup>6</sup>

**Table S4.** NBO analysis of **1\_opt** and **A-C** including the natural atomic partial charges Q [e], Wiberg bond indices (WBI) [a.u.], Mayer bond orders (MBO) [a.u.] and orbital character of the Ge lone-pair [%].

|              | Q(Ge) | Q(E)                              | WBI<br>(Ge-E)                   | MBO<br>(Ge-E)                   | Orbital character | Ge lone pair |
|--------------|-------|-----------------------------------|---------------------------------|---------------------------------|-------------------|--------------|
|              |       |                                   |                                 |                                 | s                 | p            |
| <b>A</b>     | +1.13 | -0.55                             | 0.60                            | 0.94                            | 83.3              | 16.6         |
| <b>B</b>     | +0.78 | C: -0.50<br>Si: -0.60             | C: 0.66<br>Si: 0.92             | C: 1.00<br>Si: 0.92             | 79.9              | 20.0         |
| <b>C</b>     | +0.41 | N: -1.37<br>Zn: 1.03              | N: 0.55<br>Zn: 0.81             | N: 1.12<br>Zn: 0.90             | 86.3              | 13.6         |
| <b>1_opt</b> | +0.45 | C: -0.48<br>Ga: 1.23<br>Cl: -0.55 | C: 0.69<br>Ga: 1.00<br>Cl: 0.40 | C: 0.99<br>Ga: 0.89<br>Cl: 0.46 | 83.5              | 16.5         |

**Table S5.** Comparison of the computed electronic properties of acyclic germylenes **A-C** and **1\_opt** in H<sub>2</sub> activation. The root mean square deviation (RMSD) from the experimental structure is given in %.

|                           | E <sub>HOMO</sub><br>[eV] | E <sub>LUMO</sub><br>[eV] | ΔE <sub>HOMO-LUMO</sub><br>[eV] | ∠ <sub>exp.</sub> (E-Ge-E)<br>[°] | ∠ <sub>calc.</sub> (E-Ge-E)<br>[°] | RMSD |
|---------------------------|---------------------------|---------------------------|---------------------------------|-----------------------------------|------------------------------------|------|
| <b>A</b> <sup>12</sup>    | -5.25                     | -1.96                     | 3.29                            | 114.4                             | 114.6                              | 0.57 |
| <b>B</b> <sup>13</sup>    | -5.26                     | -2.13                     | 3.13                            | 112.7                             | 111.9                              | 0.10 |
| <b>C</b> <sup>14</sup>    | -5.15                     | -1.64                     | 3.51                            | 110.7                             | 107.2                              | 0.44 |
| <b>1_opt</b> <sup>1</sup> | -4.98                     | -1.32                     | 3.67                            | 103.97, 113.4                     | 98.2, 111.5                        | 0.44 |

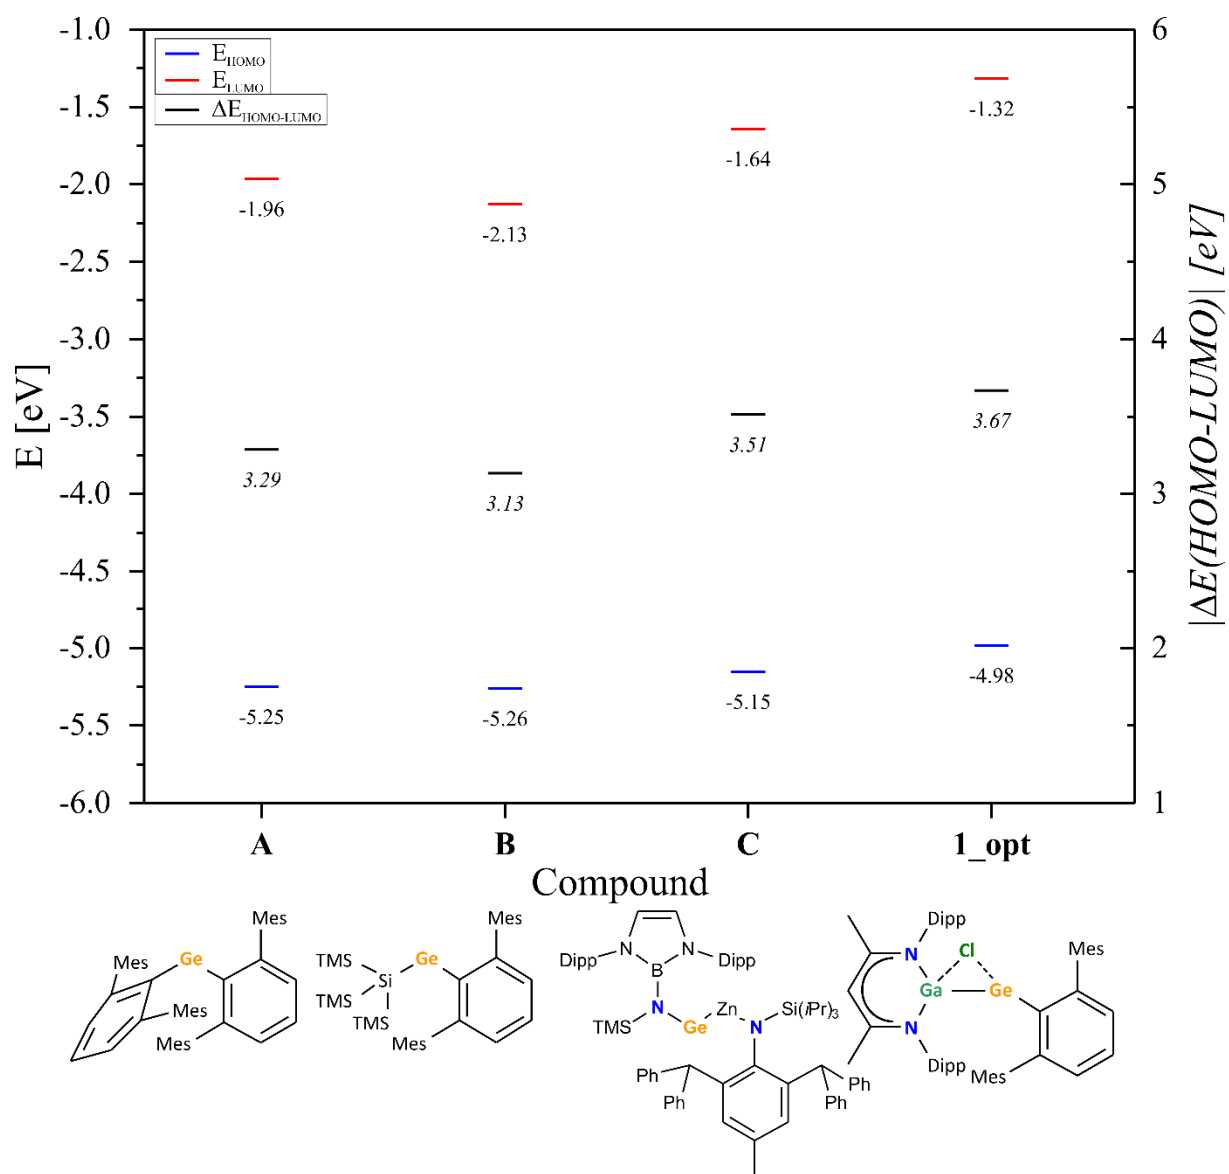

**Figure S14.** Comparison of frontier orbital energies ( $E_{\text{HOMO}}$ ,  $E_{\text{LUMO}}$ ) [eV] and the energy gap ( $E_{\text{HOMO-LUMO}}$ ) [eV] of A-C and **1\_opt**.

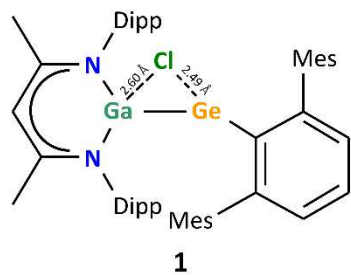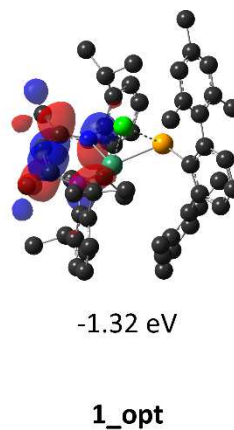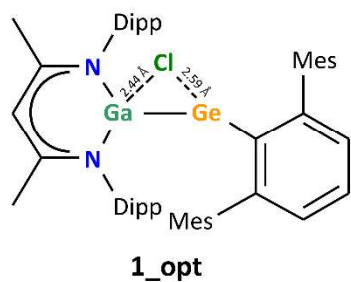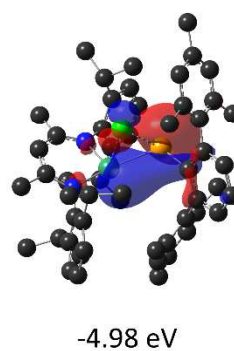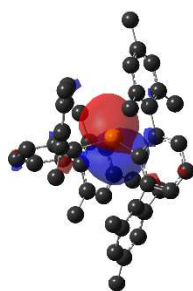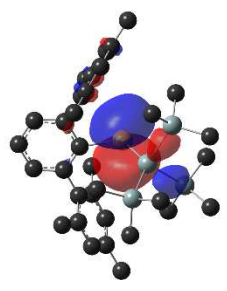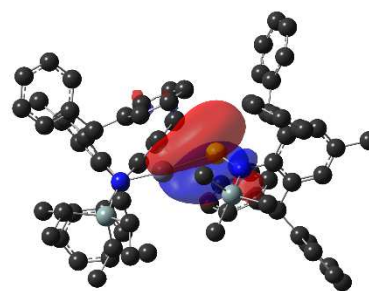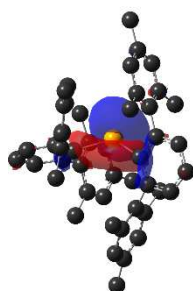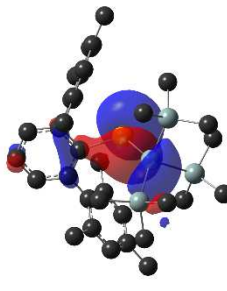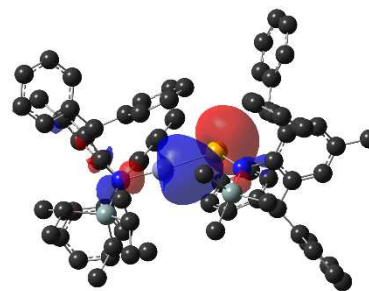

**Figure S15.** Frontier orbitals of **A**, **B**, **C** and **1\_opt** (isovalue 0.03). The hydrogens are omitted for clarity.

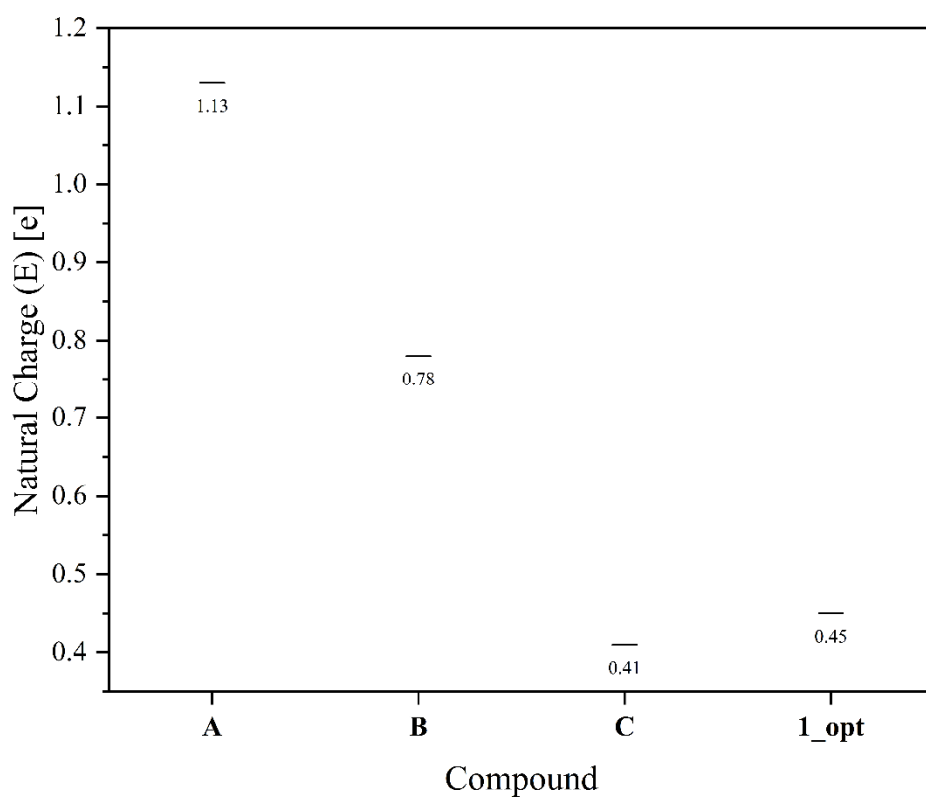

**Figure S16.** Comparison of the computed natural partial charge [e] of the Ge atom in A-C and **1\_opt**.



**Table S4.** Cartesian coordinates [ $\text{\AA}$ ] of computed compounds **A**, **B**, **C** and **1\_opt** with the corresponding final single point energies (FSPE) [Ha].

| MesTerphGe (A) |          |           |          | MesTerphGeHypsi (B) |           |           |           |
|----------------|----------|-----------|----------|---------------------|-----------|-----------|-----------|
| Ge             | 5.169160 | 31.691471 | 6.234271 | Ge                  | 6.964405  | 12.479172 | 1.988653  |
| C              | 4.155578 | 33.050920 | 5.145701 | Si                  | 9.390041  | 12.265045 | 2.068912  |
| C              | 6.182870 | 30.331942 | 5.145930 | Si                  | 10.187194 | 14.288506 | 1.146670  |
| C              | 4.464167 | 34.359581 | 5.563203 | C                   | 11.665648 | 14.007020 | 0.014807  |
| C              | 3.037545 | 32.877298 | 4.317408 | C                   | 8.831730  | 15.129534 | 0.155569  |
| C              | 5.874541 | 29.023261 | 5.563547 | C                   | 10.775075 | 15.441151 | 2.511942  |
| C              | 7.301086 | 30.505717 | 4.317936 | Si                  | 10.862688 | 11.496551 | 3.733098  |
| C              | 3.725663 | 35.450670 | 5.123381 | C                   | 12.630569 | 11.923273 | 3.238931  |
| C              | 5.601068 | 34.622871 | 6.488437 | C                   | 10.548104 | 12.273394 | 5.416320  |
| C              | 2.320203 | 33.989362 | 3.873435 | C                   | 10.755889 | 9.622214  | 3.854451  |
| C              | 2.435976 | 31.575332 | 3.924972 | Si                  | 9.560497  | 10.759964 | 0.248058  |
| C              | 6.613539 | 27.932321 | 5.124183 | C                   | 11.349823 | 10.268548 | -0.076114 |
| C              | 4.737426 | 28.759645 | 6.488417 | C                   | 8.588829  | 9.194566  | 0.607599  |
| C              | 8.018989 | 29.393814 | 3.874471 | C                   | 8.856008  | 11.531204 | -1.317195 |
| C              | 7.902169 | 31.807747 | 3.924945 | C                   | 6.142366  | 12.312641 | 3.796410  |
| C              | 2.657296 | 35.270629 | 4.264696 | C                   | 5.738156  | 11.136782 | 4.435568  |
| H              | 3.994501 | 36.443191 | 5.467952 | C                   | 4.992986  | 11.217020 | 5.609063  |
| C              | 5.446131 | 34.479252 | 7.876901 | C                   | 4.632627  | 12.442899 | 6.144429  |
| C              | 6.792931 | 35.147205 | 5.968935 | C                   | 5.002821  | 13.609611 | 5.495000  |
| H              | 1.460323 | 33.828122 | 3.232895 | C                   | 5.741908  | 13.543970 | 4.321329  |
| C              | 2.487068 | 31.157304 | 2.591241 | C                   | 6.089466  | 14.783230 | 3.575297  |
| C              | 1.609634 | 30.903239 | 4.836256 | C                   | 5.249622  | 15.233916 | 2.542433  |
| C              | 7.682201 | 28.112519 | 4.265897 | C                   | 4.009047  | 14.480091 | 2.175363  |
| H              | 6.344853 | 26.939780 | 5.468817 | C                   | 5.559085  | 16.424005 | 1.895744  |
| C              | 4.891861 | 28.903128 | 7.876937 | C                   | 6.657160  | 17.191256 | 2.259025  |
| C              | 3.545877 | 28.235038 | 5.968434 | C                   | 7.458274  | 16.742608 | 3.301645  |
| H              | 8.878999 | 29.555221 | 3.234141 | C                   | 7.198257  | 15.550685 | 3.962036  |
| C              | 7.849284 | 32.225899 | 2.591330 | C                   | 8.062738  | 15.103344 | 5.098421  |
| C              | 8.729723 | 32.479626 | 4.835214 | C                   | 6.989799  | 18.452891 | 1.526237  |
| H              | 2.077339 | 36.118669 | 3.920700 | C                   | 6.050999  | 9.801631  | 3.867801  |
| C              | 6.530437 | 34.745661 | 8.703535 | C                   | 7.010003  | 8.986906  | 4.482418  |
| C              | 4.133775 | 34.080665 | 8.472489 | C                   | 7.722180  | 9.442075  | 5.719823  |
| C              | 7.843912 | 35.417925 | 6.833042 | C                   | 7.274701  | 7.731726  | 3.951067  |
| C              | 6.910599 | 35.462053 | 5.111455 | C                   | 6.595905  | 7.249669  | 2.839785  |
| C              | 1.703563 | 30.083900 | 2.184080 | C                   | 5.617795  | 8.053579  | 2.273434  |
| C              | 3.324583 | 31.886537 | 1.584618 | C                   | 5.331984  | 9.322028  | 2.764681  |
| C              | 0.817073 | 29.858726 | 4.380646 | C                   | 4.233785  | 10.127650 | 2.135564  |
| C              | 1.531775 | 31.321496 | 6.273171 | C                   | 6.930234  | 5.914283  | 2.252057  |
| H              | 8.262562 | 27.264592 | 3.922302 | H                   | 12.482286 | 13.508464 | 0.540277  |
| C              | 3.807408 | 28.636114 | 8.703198 | H                   | 12.037502 | 14.972724 | -0.341144 |
| C              | 6.203809 | 29.302307 | 8.473042 | H                   | 11.409142 | 13.407096 | -0.859381 |
| C              | 2.494802 | 27.963601 | 6.832191 | H                   | 7.970545  | 15.366981 | 0.782554  |
| C              | 3.428605 | 27.920782 | 4.510785 | H                   | 9.204918  | 16.062007 | -0.278850 |
| C              | 8.632450 | 33.299155 | 2.183196 | H                   | 8.483879  | 14.492449 | -0.659335 |
| C              | 7.010091 | 31.496677 | 1.586145 | H                   | 9.989417  | 15.630164 | 3.240994  |
| C              | 9.521811 | 33.524117 | 4.378668 | H                   | 11.080670 | 16.400882 | 2.084736  |
| C              | 8.809270 | 32.061040 | 6.271942 | H                   | 11.634165 | 15.022479 | 3.039699  |
| C              | 7.743461 | 35.194813 | 8.200013 | H                   | 12.881971 | 11.507020 | 2.261857  |
| H              | 6.414252 | 34.617848 | 9.775013 | H                   | 12.791744 | 13.001813 | 3.196747  |
| H              | 3.311644 | 34.651542 | 8.057150 | H                   | 13.331614 | 11.509738 | 3.970231  |
| H              | 4.135718 | 34.237134 | 9.551182 | H                   | 9.523616  | 12.125567 | 5.760258  |
| H              | 3.926319 | 33.021448 | 8.284617 | H                   | 10.738259 | 13.348290 | 5.384944  |
| H              | 8.765590 | 35.820345 | 6.425749 | H                   | 11.219907 | 11.836527 | 6.160847  |
| C              | 0.844503 | 29.435706 | 3.058752 | H                   | 9.726808  | 9.273411  | 3.933266  |
| H              | 1.750613 | 29.763040 | 1.147846 | H                   | 11.309356 | 9.262617  | 4.726635  |
| H              | 4.203337 | 32.337651 | 2.042151 | H                   | 11.194121 | 9.158971  | 2.968129  |
| H              | 2.758150 | 32.697371 | 1.117294 | H                   | 11.980325 | 11.131494 | -0.293020 |
| H              | 3.649082 | 31.213884 | 0.789392 | H                   | 11.781485 | 9.740905  | 0.776236  |
| H              | 0.152994 | 29.364233 | 5.082321 | H                   | 11.391496 | 9.595314  | -0.937728 |
| H              | 0.682955 | 30.847794 | 6.766398 | H                   | 7.523834  | 9.405146  | 0.724286  |
| H              | 1.436888 | 32.403959 | 6.373587 | H                   | 8.924688  | 8.713034  | 1.527293  |
| H              | 2.428738 | 31.023920 | 6.827565 | H                   | 8.700046  | 8.479415  | -0.213077 |
| C              | 2.594760 | 28.186458 | 8.199247 | H                   | 7.822968  | 11.850329 | -1.163511 |
| H              | 3.923212 | 28.763808 | 9.774732 | H                   | 9.431226  | 12.399414 | -1.642925 |
| H              | 7.026578 | 28.732972 | 8.036915 | H                   | 8.867382  | 10.798271 | -2.129241 |
| H              | 6.202051 | 29.144376 | 9.551525 | H                   | 4.678982  | 10.300435 | 6.096401  |
| H              | 6.410019 | 30.362022 | 8.286579 | H                   | 4.048908  | 12.487327 | 7.055951  |
| H              | 1.573418 | 27.560864 | 6.424551 | H                   | 4.707026  | 14.576346 | 5.888244  |
| C              | 9.492765 | 33.947157 | 3.056827 | H                   | 3.465702  | 14.993459 | 1.382655  |
| H              | 8.584101 | 33.620104 | 1.147050 | H                   | 3.346968  | 14.372578 | 3.037266  |
| H              | 6.129815 | 31.049375 | 2.044540 | H                   | 4.245077  | 13.471306 | 1.827394  |

|             |                    |           |           |      |                    |           |           |
|-------------|--------------------|-----------|-----------|------|--------------------|-----------|-----------|
| H           | 7.574216           | 30.682836 | 1.121269  | H    | 4.912311           | 16.768069 | 1.095337  |
| H           | 6.687923           | 32.168221 | 0.789054  | H    | 8.309383           | 17.340652 | 3.610185  |
| H           | 10.186779          | 34.018561 | 5.079542  | H    | 8.894280           | 15.790004 | 5.255660  |
| H           | 9.657304           | 32.536414 | 6.764902  | H    | 7.493106           | 15.040847 | 6.028034  |
| H           | 8.906670           | 30.978731 | 6.371806  | H    | 8.466685           | 14.106905 | 4.912936  |
| H           | 7.911903           | 32.356216 | 6.826917  | H    | 7.504030           | 19.165369 | 2.172543  |
| C           | 8.912603           | 35.433503 | 9.104430  | H    | 6.094070           | 18.931769 | 1.128786  |
| C           | 0.004543           | 28.282742 | 2.603701  | H    | 7.650508           | 18.241417 | 0.680319  |
| C           | 1.425461           | 27.947021 | 9.103264  | H    | 8.565736           | 8.791136  | 5.948075  |
| C           | 10.332230          | 35.100064 | 2.600715  | H    | 8.088909           | 10.463401 | 5.615818  |
| H           | 9.530436           | 34.533946 | 9.184774  | H    | 7.053212           | 9.437364  | 6.583682  |
| H           | 8.590514           | 35.697319 | 10.112708 | H    | 8.028533           | 7.110056  | 4.424166  |
| H           | 9.551141           | 36.233936 | 8.727618  | H    | 5.053914           | 7.683147  | 1.423033  |
| H           | -0.242765          | 28.362773 | 1.544287  | H    | 4.629228           | 10.926718 | 1.500025  |
| H           | -0.926675          | 28.221539 | 3.168967  | H    | 3.607649           | 10.605433 | 2.890558  |
| H           | 0.532540           | 27.333778 | 2.742316  | H    | 3.603953           | 9.493820  | 1.511097  |
| H           | 0.806832           | 28.846076 | 9.183114  | H    | 6.056807           | 5.451507  | 1.790392  |
| H           | 1.747371           | 27.683747 | 10.111739 | H    | 7.693830           | 6.017386  | 1.475222  |
| H           | 0.787747           | 27.145948 | 8.726412  | H    | 7.321603           | 5.231489  | 3.007390  |
| H           | 10.579952          | 35.018940 | 1.541476  | FSPE | -4522.322923634767 |           |           |
| H           | 11.263214          | 35.162461 | 3.166225  |      |                    |           |           |
| H           | 9.803609           | 36.048873 | 2.738007  |      |                    |           |           |
| H           | 2.449164           | 27.504962 | 4.284889  |      |                    |           |           |
| H           | 4.186654           | 27.197633 | 4.204205  |      |                    |           |           |
| H           | 3.571748           | 28.810338 | 3.894925  |      |                    |           |           |
| H           | 7.890275           | 35.877503 | 4.285908  |      |                    |           |           |
| H           | 6.152949           | 36.185724 | 4.205115  |      |                    |           |           |
| H           | 6.767095           | 34.572869 | 3.895155  |      |                    |           |           |
| FSPE        | -3934.605091174609 |           |           |      |                    |           |           |
| LZnTBoN (C) |                    |           |           |      |                    |           |           |
| Zn          | -0.608738          | 4.451200  | 8.188739  | C    | -2.320508          | 6.149388  | 11.137908 |
| N           | -2.365276          | 4.163055  | 7.532568  | C    | -1.393834          | 1.563398  | 9.119959  |
| Ge          | 1.280382           | 5.232985  | 9.614172  | C    | -1.258098          | 2.311397  | 10.287295 |
| N           | 2.833380           | 5.116544  | 8.585116  | C    | -0.284512          | 0.860473  | 8.654957  |
| Si          | -2.686527          | 4.326440  | 5.832195  | C    | -3.596732          | 6.473919  | 4.048180  |
| C           | -4.169316          | 3.241630  | 5.343186  | C    | -1.823381          | 7.026262  | 5.735904  |
| C           | -1.079618          | 3.752696  | 4.986432  | C    | 4.079643           | 9.137834  | 7.883673  |
| C           | -3.032805          | 6.149177  | 5.428468  | C    | -6.682223          | 2.877403  | 11.088820 |
| Si          | 3.009643           | 4.607916  | 6.907268  | C    | -0.855746          | 2.248537  | 5.106614  |
| C           | 2.459364           | 2.836526  | 6.702790  | C    | -0.882194          | 4.211951  | 3.545158  |
| C           | 2.027048           | 5.705953  | 5.741157  | C    | 6.545938           | 2.782417  | 8.978289  |
| C           | 4.809568           | 4.734245  | 6.419423  | C    | 7.315427           | 1.891706  | 8.240905  |
| C           | -3.379097          | 3.876448  | 8.462754  | C    | 5.171510           | 1.751244  | 13.688578 |
| C           | 3.967484           | 5.615854  | 9.286666  | C    | -6.749521          | 7.696834  | 7.203119  |
| C           | -3.668564          | 2.534465  | 8.804751  | C    | -3.280021          | 0.062346  | 8.435289  |
| C           | -4.731160          | 2.232665  | 9.636110  | C    | -4.021055          | -0.428523 | 7.364958  |
| C           | -2.705676          | 1.458151  | 8.362606  | C    | -3.118143          | -0.745821 | 9.555413  |
| C           | 2.117584           | 8.166896  | 9.155006  | C    | -0.046921          | 2.352171  | 10.971133 |
| C           | 2.138967           | 8.539575  | 10.497121 | C    | -3.683971          | 8.175888  | 12.415564 |
| C           | 0.885997           | 8.082933  | 8.507342  | C    | -5.503306          | 3.791142  | 5.846144  |
| C           | 3.388813           | 7.888266  | 8.387512  | C    | -4.253432          | 2.925699  | 3.850772  |
| C           | -4.100061          | 4.877892  | 9.136325  | C    | -1.977800          | 6.496746  | 12.430198 |
| C           | 4.736882           | 4.795326  | 10.117896 | C    | -4.591309          | -1.690188 | 7.411423  |
| C           | 4.297201           | 6.979064  | 9.186185  | C    | -4.428332          | -2.485807 | 8.536230  |
| C           | 5.388387           | 7.480941  | 9.872936  | C    | -2.663996          | 7.515136  | 13.079424 |
| C           | 6.162834           | 6.675090  | 10.700340 | C    | -5.056378          | 9.385238  | 7.270780  |
| C           | 5.806504           | 5.343532  | 10.819522 | C    | 5.041325           | 9.002241  | 6.883893  |
| C           | 4.417177           | 3.329456  | 10.284554 | C    | 3.803540           | 10.410317 | 8.365305  |
| C           | -4.656975          | 7.240540  | 8.322193  | C    | 4.478248           | 11.518667 | 7.868791  |
| C           | -5.925654          | 6.841451  | 7.923111  | C    | -3.688957          | -2.008903 | 9.607416  |
| C           | -4.240390          | 8.529015  | 7.987766  | C    | -0.292055          | 8.369122  | 9.183862  |
| C           | -3.693893          | 6.330935  | 9.054545  | C    | -0.257477          | 8.753427  | 10.512882 |
| C           | 5.607852           | 0.229526  | 8.462960  | C    | 4.194939           | 2.335812  | 14.476496 |
| C           | 6.850511           | 0.614199  | 7.978050  | C    | 0.964516           | 8.840203  | 11.165341 |
| C           | 4.846881           | 1.120580  | 9.198900  | C    | 3.305000           | 3.236010  | 13.903997 |
| C           | 5.299941           | 2.410958  | 9.465809  | C    | 1.047553           | 1.646520  | 10.497079 |
| C           | -5.142130          | 4.535376  | 9.993768  | C    | 0.921582           | 0.902138  | 9.331851  |
| C           | -5.512122          | 3.224028  | 10.221604 | C    | 5.436452           | 11.370694 | 6.880912  |
| C           | 7.345107           | 7.233930  | 11.430514 | C    | -6.319714          | 8.969967  | 6.871437  |
| C           | 4.370952           | 2.952169  | 11.754502 | C    | 5.714718           | 10.103181 | 6.386211  |
| C           | 5.257525           | 2.055647  | 12.335458 | H    | 5.635744           | 8.531848  | 9.769107  |
| C           | 3.396745           | 3.543078  | 12.558574 | H    | 5.231051           | -0.767021 | 8.265556  |
| C           | -3.345653          | 6.804164  | 10.457534 | H    | 3.883055           | 0.811467  | 9.586317  |
| C           | -4.022269          | 7.823313  | 11.113820 | H    | -5.666653          | 5.331124  | 10.513404 |

|   |           |           |           |   |           |           |           |
|---|-----------|-----------|-----------|---|-----------|-----------|-----------|
| H | 7.131700  | 8.225767  | 11.833219 | H | 5.218608  | 5.727753  | 6.610786  |
| H | 8.206223  | 7.336072  | 10.763869 | H | 4.909456  | 4.528740  | 5.350226  |
| H | 7.642244  | 6.587274  | 12.256739 | H | 5.423029  | 4.012153  | 6.959055  |
| H | 3.403799  | 3.188362  | 9.897905  | H | 4.125592  | 2.094326  | 15.530200 |
| H | -3.811811 | 6.410157  | 6.153212  | H | 7.449150  | -0.077917 | 7.398588  |
| H | 3.084751  | 7.333123  | 7.499126  | H | 1.766052  | 0.344863  | 8.945798  |
| H | -6.488163 | 1.980337  | 11.679539 | H | 3.086546  | 8.578452  | 11.020821 |
| H | -7.573785 | 2.680015  | 10.486288 | H | -3.551950 | -2.623598 | 10.489127 |
| H | -6.923160 | 3.691700  | 11.773561 | H | -0.376824 | 0.259283  | 7.757443  |
| H | -0.288580 | 4.238734  | 5.579179  | H | -4.704064 | 10.378213 | 7.018001  |
| H | -4.944722 | 1.193685  | 9.858958  | H | 5.266388  | 8.014957  | 6.495869  |
| H | 6.916245  | 3.782534  | 9.162961  | H | 3.091947  | 2.173532  | 7.296347  |
| H | 6.020736  | 1.585339  | 11.727971 | H | 2.544928  | 2.536152  | 5.655125  |
| H | -6.270199 | 5.843643  | 8.157342  | H | 1.425558  | 2.679846  | 7.013258  |
| H | -2.114667 | 2.847593  | 10.677705 | H | 0.998887  | 9.126525  | 12.209562 |
| H | -2.764698 | 6.349554  | 8.475174  | H | 0.035684  | 2.926884  | 11.885853 |
| H | 8.282405  | 2.205089  | 7.865780  | H | -6.960034 | 9.634707  | 6.304574  |
| H | -4.824157 | 8.347154  | 10.608893 | H | -5.724343 | 4.771342  | 5.416851  |
| H | -3.995436 | 2.293807  | 5.867091  | H | -5.519102 | 3.894370  | 6.930978  |
| H | -1.784761 | 5.345708  | 10.644171 | H | -6.323049 | 3.121399  | 5.565345  |
| H | -5.161659 | -2.054727 | 6.565396  | H | -1.021933 | 6.881937  | 5.006674  |
| H | -1.165990 | 5.979906  | 12.927581 | H | -1.403843 | 6.814544  | 6.724796  |
| H | -3.256465 | 8.865937  | 8.292400  | H | -2.090448 | 8.087655  | 5.718173  |
| H | 3.050338  | 10.543492 | 9.131306  | H | 1.030935  | 5.933526  | 6.123859  |
| H | 6.370236  | 4.701430  | 11.488356 | H | 1.901716  | 5.204349  | 4.777949  |
| H | -2.465705 | 1.648977  | 7.314860  | H | 2.537175  | 6.652911  | 5.549559  |
| H | -2.535822 | -0.384507 | 10.394692 | H | -3.794292 | 7.547514  | 3.961460  |
| H | -1.237457 | 8.287541  | 8.664262  | H | -4.539578 | 5.958857  | 3.860110  |
| H | 5.873300  | 1.050081  | 14.124430 | H | -2.909771 | 6.206023  | 3.242778  |
| H | -1.178021 | 8.965352  | 11.041388 | H | 5.960661  | 12.235518 | 6.492911  |
| H | 0.854919  | 7.812119  | 7.458467  | H | -5.107011 | 2.270221  | 3.648085  |
| H | 2.709404  | 4.258723  | 12.116345 | H | -3.360517 | 2.421691  | 3.478305  |
| H | -4.228205 | 8.971149  | 12.911217 | H | -4.393498 | 3.826463  | 3.249928  |
| H | 1.981200  | 1.667025  | 11.045343 | H | 0.079734  | 3.859049  | 3.158225  |
| H | 2.538136  | 3.702775  | 14.511090 | H | -0.892360 | 5.298022  | 3.452182  |
| H | -2.402606 | 7.790979  | 14.093819 | H | -1.656584 | 3.819564  | 2.882668  |
| H | 4.247068  | 12.503089 | 8.257985  | H | 6.457326  | 9.973722  | 5.607937  |
| H | -4.154305 | 0.189486  | 6.483890  | H | -1.637075 | 1.678579  | 4.598082  |
| H | -7.731368 | 7.357290  | 6.895350  | H | -0.833925 | 1.924733  | 6.147603  |
| H | -4.870752 | -3.473797 | 8.574660  | H | 0.099784  | 1.958215  | 4.658734  |

FSPE -7564.943275946212

ab\_167 (1\_opt)

|    |           |           |           |   |           |           |           |
|----|-----------|-----------|-----------|---|-----------|-----------|-----------|
| Ge | 10.577324 | 8.451335  | 3.568232  | C | 11.021620 | 3.863670  | 5.122959  |
| C  | 9.063539  | 7.149313  | 3.420842  | C | 12.987492 | 2.747338  | 6.192565  |
| Ga | 12.060781 | 7.905563  | 5.465492  | C | 8.924409  | 6.456745  | 2.205276  |
| Cl | 12.537751 | 6.767304  | 3.355633  | C | 8.036035  | 7.063338  | 4.370651  |
| N  | 12.964032 | 6.807363  | 6.795302  | C | 6.959281  | 6.207725  | 4.151831  |
| N  | 13.544966 | 9.238925  | 5.332670  | C | 8.004433  | 7.927045  | 5.579514  |
| C  | 14.767844 | 8.975156  | 5.731612  | C | 6.875680  | 5.457935  | 2.991803  |
| C  | 13.201165 | 10.482281 | 4.724919  | C | 7.846900  | 5.598441  | 2.014759  |
| C  | 14.295359 | 6.815564  | 6.919393  | C | 9.856968  | 6.691921  | 1.066752  |
| C  | 12.208789 | 5.989920  | 7.689069  | C | 7.745098  | 9.297662  | 5.455641  |
| C  | 15.128337 | 7.774859  | 6.368107  | C | 8.147435  | 7.363717  | 6.854884  |
| C  | 15.875707 | 9.971209  | 5.559707  | C | 7.645131  | 10.075988 | 6.604952  |
| C  | 14.945957 | 5.733448  | 7.728407  | C | 7.532875  | 9.955816  | 4.123684  |
| C  | 13.544560 | 10.753604 | 3.392701  | C | 7.787961  | 9.537799  | 7.872928  |
| C  | 12.429207 | 11.384662 | 5.476519  | C | 8.042571  | 8.175559  | 7.974196  |
| C  | 12.022108 | 12.566931 | 4.875297  | C | 7.644004  | 10.386728 | 9.098372  |
| C  | 12.078892 | 11.094361 | 6.918905  | C | 8.401883  | 5.900345  | 7.031056  |
| C  | 12.367612 | 12.858871 | 3.567423  | C | 10.797097 | 5.726441  | 0.689326  |
| C  | 13.120816 | 11.959190 | 2.842542  | C | 9.740414  | 7.872838  | 0.317933  |
| C  | 14.330702 | 9.801994  | 2.517617  | C | 10.607751 | 8.089933  | -0.745218 |
| C  | 10.844555 | 11.836230 | 7.406538  | C | 8.690827  | 8.897546  | 0.622729  |
| C  | 13.265589 | 11.380688 | 7.837355  | C | 11.583046 | 7.168529  | -1.096814 |
| C  | 13.529731 | 9.389827  | 1.284473  | C | 11.649262 | 5.985635  | -0.375491 |
| C  | 15.660349 | 10.413328 | 2.076542  | C | 12.545810 | 7.451691  | -2.208382 |
| C  | 11.851864 | 6.527930  | 8.935642  | C | 10.883993 | 4.416230  | 1.405768  |
| C  | 11.856455 | 4.681662  | 7.336831  | H | 16.183660 | 7.653531  | 6.564898  |
| C  | 11.134138 | 5.731370  | 9.819040  | H | 16.561756 | 9.618819  | 4.786966  |
| C  | 12.271142 | 7.918246  | 9.361714  | H | 16.445252 | 10.051725 | 6.485702  |
| C  | 10.779442 | 4.436491  | 9.486806  | H | 15.508751 | 10.953293 | 5.273658  |
| C  | 11.138044 | 3.923635  | 8.254907  | H | 14.775125 | 4.765021  | 7.254783  |
| C  | 12.243749 | 4.068610  | 6.011509  | H | 14.520038 | 5.669047  | 8.729417  |
| C  | 11.073765 | 8.779332  | 9.741434  | H | 16.017247 | 5.901588  | 7.806390  |
| C  | 13.280655 | 7.866303  | 10.506291 | H | 11.422871 | 13.272478 | 5.434852  |

|       |                    |          |           |
|-------|--------------------|----------|-----------|
| H     | 7.483586           | 5.318723 | 6.912608  |
| H     | 8.803835           | 5.694444 | 8.021674  |
| H     | 9.106698           | 5.526983 | 6.290951  |
| H     | 10.511729          | 9.007304 | -1.317723 |
| H     | 12.389519          | 5.238896 | -0.645467 |
| H     | 8.532083           | 9.549445 | -0.236763 |
| H     | 8.990813           | 9.528883 | 1.464862  |
| H     | 7.739957           | 8.434590 | 0.889544  |
| H     | 12.910618          | 6.530435 | -2.664896 |
| H     | 13.416456          | 8.000492 | -1.836852 |
| H     | 12.086620          | 8.061629 | -2.988076 |
| H     | 10.107697          | 3.726408 | 1.061721  |
| H     | 10.748742          | 4.547167 | 2.476490  |
| H     | 11.851368          | 3.943485 | 1.233645  |
| <hr/> |                    |          |           |
| FSPE  | -6628.917324079191 |          |           |
| <hr/> |                    |          |           |

#### IV. References

- [1] A. Bückler, C. Wölper, G. Haberhauer and S. Schulz, *Chem. Commun.*, 2022, **58**, 9758.
- [2] G. M. Sheldrick, *Acta Crystallogr.* 1990, **A46**, 467.
- [3] G. M. Sheldrick, SHELXL-2017, Program for the Refinement of Crystal Structures University of Göttingen, Göttingen (Germany) 2017. See also: G. M. Sheldrick () "Crystal structure refinement with SHELXL", *Acta Cryst.*, 2015, **C71**, 3.
- [4] shelXle, *A Qt GUI for SHELXL*, C. B. Hübschle, G. M. Sheldrick and B. Dittrich, *J. Appl. Cryst.* 2011, **44**, 1281.
- [5] F. Neese, *WIREs Comput Mol Sci*, 2022, 12.
- [6] NBO 7.0. E. D. Glendening, J. K. Badenhoop, A. E. Reed, J. E. Carpenter, J. A. Bohmann, C. M. Morales, P. Karafiloglou, C. R. Landis and F. Weinhold, Theoretical Chemistry Institute, University of Wisconsin, Madison (2018).
- [7] F. Weigend and R. Ahlrichs, *Phys. Chem. Chem. Phys.*, 2005, **7**, 3297.
- [8] E. Caldeweyher, C. Bannwarth, S. Grimme, *J. Chem. Phys.*, 2017, **147**, 34112.
- [9] E. Caldeweyher, S. Ehlert, A. Hansen, H. Neugebauer, S. Spicher, C. Bannwarth and S. Grimme, *J. Chem. Phys.*, 2019, **150**, 154122.
- [10] J. P. Perdew, M. Ernzerhof and K. Burke, *J. Chem. Phys.*, 1996, **105**, 9982.
- [11] C. Adamo and V. Barone, *J. Chem. Phys.*, 1999, **110**, 6158.
- [12] Y. Peng, J.-D. Guo, B. D. Ellis, Z. Zhu, J. C. Fettinger, S. Nagase and P. P. Power, *J. Am. Chem. Soc.*, 2009, **131**, 16272.
- [13] M. Usher, A. V. Protchenko, A. Rit, J. Campos, E. L. Kolychev, R. Tirfoin and S. Aldridge, *Chem. Eur. J.*, 2016, **22**, 11685.
- [14] M. M. Juckel, J. Hicks, D. Jiang, L. Zhao, G. Frenking and C. Jones, *Chem. Commun.*, 2017, **53**, 12692.
